# Supplementary material for: Dataset on large area nano-crystalline graphite film (NCG) grown on SiO2 using plasma-enhanced chemical vapour deposition
Source: PubMed Central journal article supplement (PMC6484281; doi:10.1016/j.dib.2019.103923), 2019-04-16
Supplement: mmc1.pdf [file mmc1.pdf]

Declaration of conflict of interest

I hereby declare, on behalf of all co-authors, that no conflict of interest is competing in between all the authors! I declare that the data submitted with this paper was not published elsewhere nor is submitted for publication!

Best regards,

Sandra Eremia

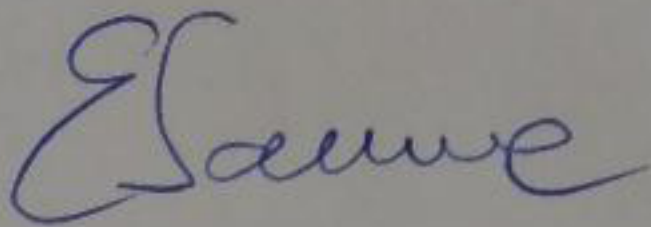A handwritten signature in blue ink, appearing to read 'Sandra Eremia', written in a cursive style.
